# Supplementary material for: Vibrational probing of the hydrogen-bond structure and dynamics of water in aqueous NaPF6 solutions
Source: Royal Society of Chemistry journal article supplement (doi:10.1039/c5nj00160a), 2015-01-01
Supplement: c5nj00160a1.pdf [file c5nj00160a1.pdf]

**Electronic Supplementary Information for**  
**Vibrational Probing of the H-bond Structure and Dynamics of**  
**Water in Aqueous NaPF<sub>6</sub> Solutions**

**Chiho Lee,<sup>1†</sup> Dayoung Nam,<sup>1†</sup> and Sunnam Park<sup>1,2\*</sup>**

<sup>1</sup>Department of Chemistry, Korea University, Seoul 136-701, Korea.

<sup>2</sup>Multidimensional Spectroscopy Laboratory, Korea Basic Science Institute, Seoul 136-713,  
Korea.

\* Authors to whom correspondence should be addressed.  
Email addresses: spark8@korea.ac.kr

## 1. Decomposition of the OD stretch band into three contributions (OD<sub>w</sub>, OD<sub>C</sub>, and OD<sub>A</sub>)

$$\begin{aligned}
 S(\omega) &= \alpha \cdot S_{\text{OD}_w}(\omega) + S_{\text{OD}_C}(\omega) + S_{\text{OD}_A}(\omega) \\
 &= \alpha \cdot S_{\text{OD}_w}(\omega) \\
 &+ A_1 \left\{ m_1 \frac{2}{\pi} \frac{w_1}{4(\omega - \omega_1)^2 - w_1^2} + (1 - m_1) \sqrt{\frac{4 \log 2}{\pi}} \frac{1}{w_1} \exp \left[ -4 \log 2 \frac{(\omega - \omega_1)^2}{w_1^2} \right] \right\} \\
 &+ A_2 \left\{ m_2 \frac{2}{\pi} \frac{w_2}{4(\omega - \omega_2)^2 - w_2^2} + (1 - m_2) \sqrt{\frac{4 \log 2}{\pi}} \frac{1}{w_2} \exp \left[ -4 \log 2 \frac{(\omega - \omega_2)^2}{w_2^2} \right] \right\}
 \end{aligned}$$

where  $\alpha$  is the scaling factor for the OD stretch band of neat water (OD<sub>w</sub>). The second and third terms are the pseudo Voigt profiles to fit the OD<sub>C</sub> and OD<sub>A</sub> peaks, respectively. The results of decomposition of FTIR spectra into three contributions are shown in Figures S1.

## 2. Raman experimental setup

Our Raman experimental setup consists of a 100 mW 532 nm laser and a monochromator coupled with a CCD camera. A Raman edge filter was placed in front of the monochromator to attenuate the intense Rayleigh scattering. The average spectral resolution is  $\sim 1.7 \text{ cm}^{-1}$ .

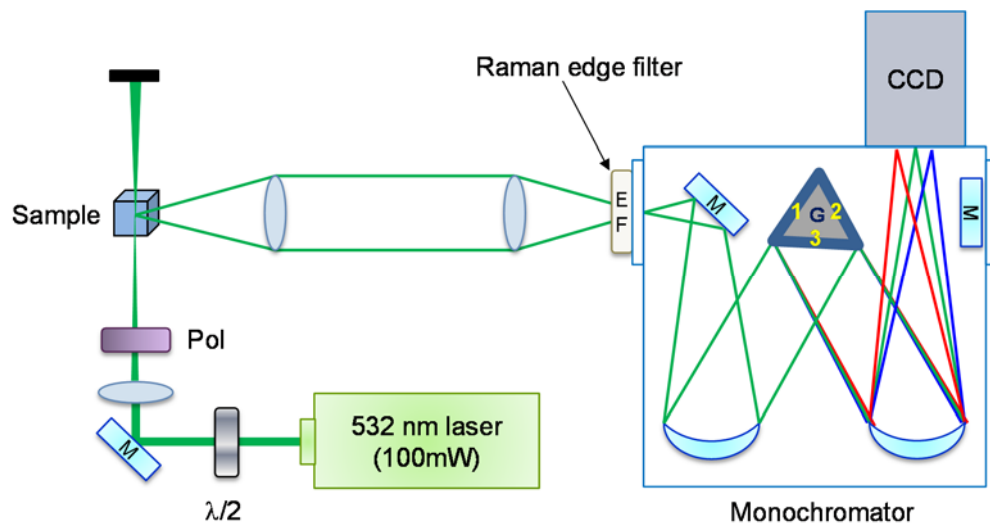

**Table S1.** Fit parameters of the decomposition of FTIR spectra into three contributions

|       | $\omega_1$ (cm <sup>-1</sup> ) | A <sub>1</sub> | $w_1$ (cm <sup>-1</sup> ) | $m_1$     | $\omega_2$ (cm <sup>-1</sup> ) | A <sub>2</sub> | $w_2$ (cm <sup>-1</sup> ) | $m_2$     | $\alpha$  |
|-------|--------------------------------|----------------|---------------------------|-----------|--------------------------------|----------------|---------------------------|-----------|-----------|
| 1.0 M | 2541±1                         | 13.2±0.1       | 150±1                     | 0.08±0.01 | 2669±1                         | 2.07±0.1       | 30±1                      | 0.60±0.01 | 0.68±0.01 |
| 3.0 M | 2541±1                         | 24.8±0.1       | 150±1                     | 0.08±0.01 | 2669±1                         | 5.1±0.1        | 30±1                      | 0.60±0.01 | 0.39±0.01 |
| 5.0 M | 2541±1                         | 31.1±0.1       | 150±1                     | 0.08±0.01 | 2669±1                         | 8.2±0.1        | 30±1                      | 0.60±0.01 | 0.18±0.01 |

**Table S2.** Fit parameters of the decomposition of Raman spectra into three contributions

|       | $\omega_1$ (cm <sup>-1</sup> ) | A <sub>1</sub> | $w_1$ (cm <sup>-1</sup> ) | $m_1$ | $\omega_2$ (cm <sup>-1</sup> ) | A <sub>2</sub> | $w_2$ (cm <sup>-1</sup> ) | $m_2$     | $\alpha$  |
|-------|--------------------------------|----------------|---------------------------|-------|--------------------------------|----------------|---------------------------|-----------|-----------|
| 1.0 M | 2556±1                         | 47±1           | 143±1                     | 0     | 2665±1                         | 31±1           | 39±1                      | 0.78±0.01 | 0.75±0.01 |
| 3.0 M | 2556±1                         | 113±1          | 143±1                     | 0     | 2665±1                         | 73±1           | 34±1                      | 0.74±0.01 | 0.44±0.01 |
| 5.0 M | 2556±1                         | 125±1          | 143±1                     | 0     | 2665±1                         | 103±1          | 32±1                      | 0.75±0.01 | 0.25±0.01 |

**Figure S1.**

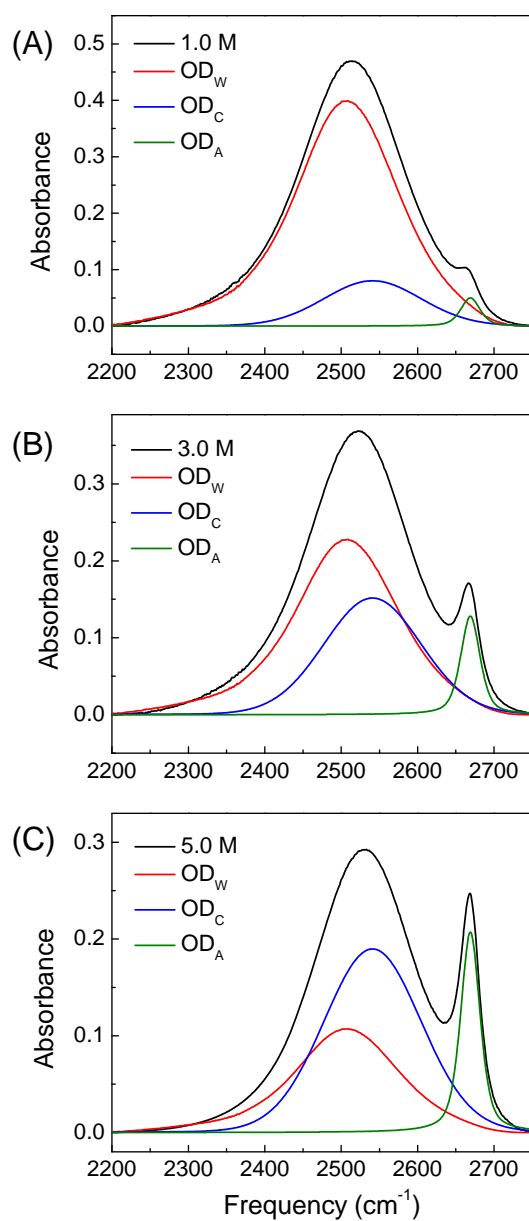

**Figure S1.** Decomposition of the OD stretch band in the FTIR spectra into three contributions ( $\text{OD}_W$ ,  $\text{OD}_C$ , and  $\text{OD}_A$ ) in 1.0, 3.0, and 5.0 M  $\text{NaPF}_6$  solutions.

**Figure S2**

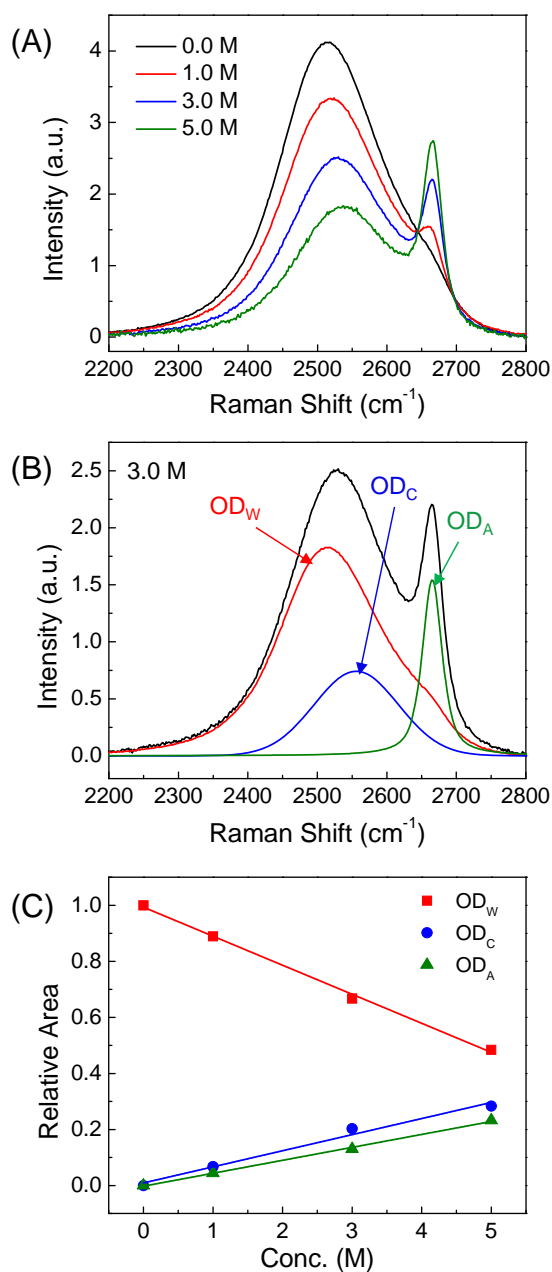

**Figure S2.** (A) The OD stretch band in the Raman spectra measured with aqueous NaPF<sub>6</sub> solutions at different concentrations. (B) Decomposition of the OD stretch band into three contributions: the OD stretch band of water in bulk (OD<sub>w</sub>), hydration shells of Na<sup>+</sup> ions (OD<sub>c</sub>), and hydration shells of PF<sub>6</sub><sup>-</sup> ions (OD<sub>a</sub>). (C) Relative areas of three OD stretch peaks are plotted as a function of concentration.

**Figure S3.**

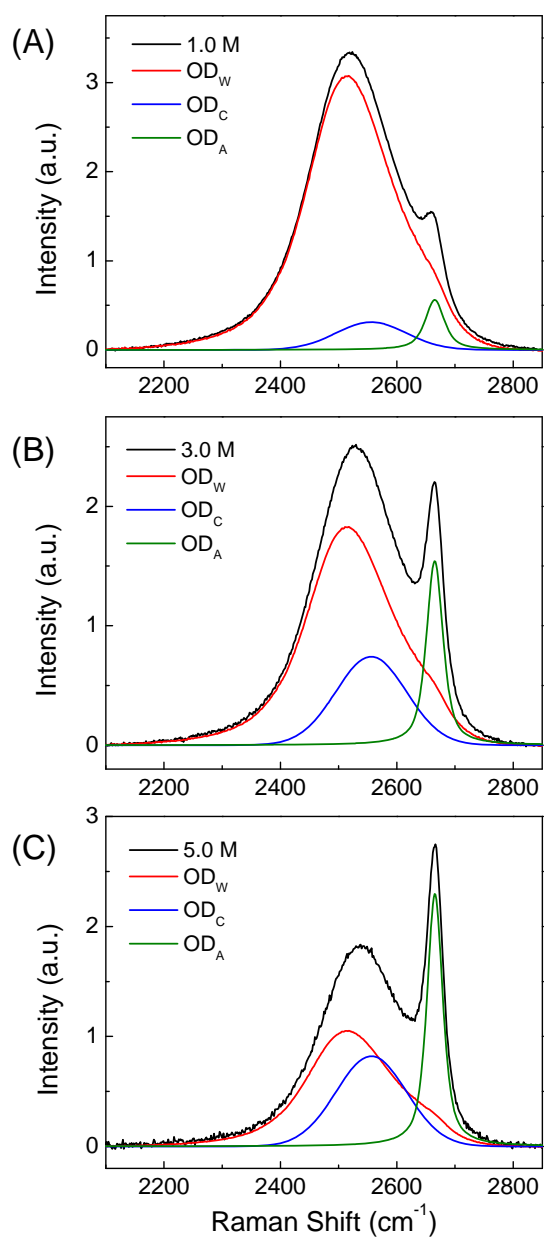

**Figure S3.** Decomposition of the OD stretch band in the Raman spectrum into three contributions (OD<sub>W</sub>, OD<sub>C</sub>, and OD<sub>A</sub>) in 1.0, 3.0, and 5.0 M NaPF<sub>6</sub> solutions.

Figure S4

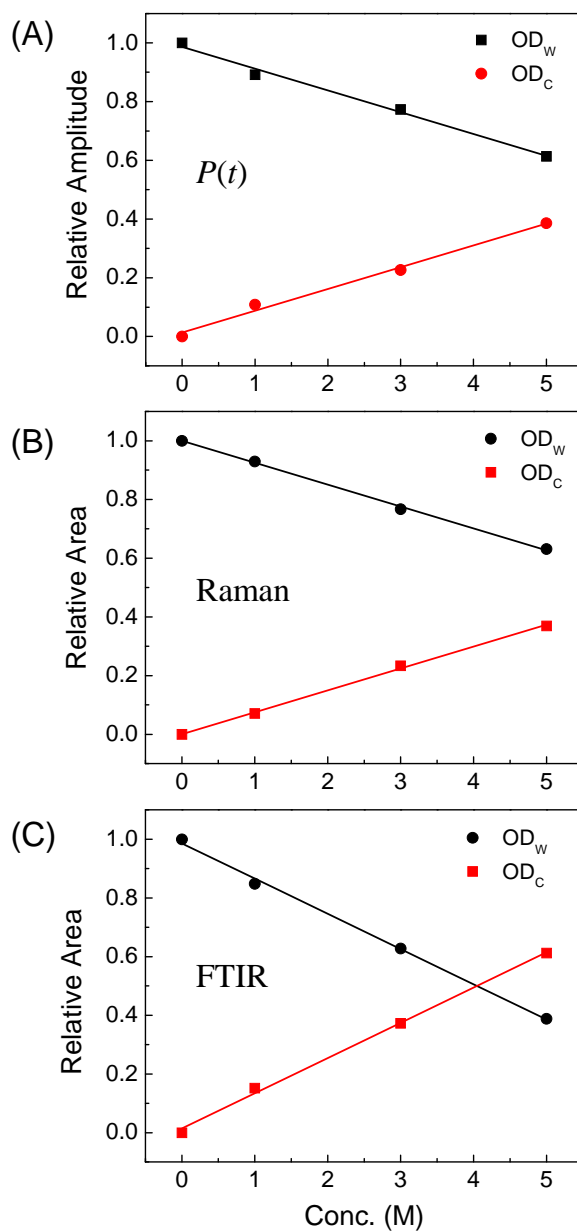

**Figure S4.** Results of two-state model analysis. (A) Relative amplitudes of two components ( $OD_w$  and  $OD_c$ ) in population decay,  $P(t)$ . (B) Relative areas of two subsets ( $OD_w$  and  $OD_c$ ) in Raman spectrum. (C) Relative areas of two subsets ( $OD_w$  and  $OD_c$ ) in FTIR spectrum.
